# Supplementary material for: Convergence in the Design of Final Palaeolitihc, Mesolithic and Ethnographic Projectile Points.
Source: Research Square preprint supplement (doi:10.21203/rs.3.rs-2375195/v1), 2023-01-04
Supplement: Supplementary file 1 [file 4c34e007312f4af3108ef889.xlsx]

## Sheet: Arkusz1
						Context	n=	Total	Reference
						Ethnographic	n=12		Griffin 1997
						Mesolithic	n=14	n=276	Gurina 1956
						Final Palaeolithic	n=250		Serwatka 2018
