# Supplementary material for: Convergence in the Design of Final Palaeolitihc, Mesolithic and Ethnographic Projectile Points.
Source: Research Square preprint supplement (doi:10.21203/rs.3.rs-2375195/v1), 2023-01-04
Supplement: Supplementary file 2 [file f5d59ce981618db665846704.xlsx]

## Sheet: Arkusz1
					PC	Eigenvalue	% variance
					1	0.00346152	47.116
					2	0.00110911	15.096
					3	0.000881493	11.998
					4	0.000420216	5.7197
					5	0.000388703	5.2907
					6	0.000216756	2.9503
					7	0.000169335	2.3049
					8	0.000131097	1.7844
					9	8.67552E-05	1.1808
					10	7.91117E-05	1.0768
