# Supplementary material for: Convergence in the Design of Final Palaeolitihc, Mesolithic and Ethnographic Projectile Points.
Source: Research Square preprint supplement (doi:10.21203/rs.3.rs-2375195/v1), 2023-01-04
Supplement: Supplementary file 3 [file fa6d875caec610782bb5e524.xlsx]

## Sheet: Arkusz1
					Distance	Characteristics	Purpose
						-Broad lanceolate/oblanceolate points
					Short range projectiles	-Heavy	Induce shock and damageto kill off quickly at close range
						-Simple construction
						-Narrow points with sharp tip
					Long range projectiles	-Light	Enhance penetration to keep the arrow inside prey's body
						-Complex arrows with barbs
